# Supplementary material for: Enhanced homology-directed human genome engineering by controlled timing of CRISPR/Cas9 delivery
Source: eLife. 2014 Dec 15;3:e04766. doi: 10.7554/eLife.04766 (PMC4383097; doi:10.7554/eLife.04766)
Supplement: Supplementary file 1. — PCR primers for target loci amplification and indexing for deep sequencing of on-target and off-target sites. Also included is deep sequencing data and analysis. DOI: http://dx.doi.org/10.7554/eLife.04766.008 [file elife04766s001.xlsx]

## Sheet: NGS Targets
Target sequences analyzed by next-gen sequencing in Lin,Staahl, Alla, Doudna. 2014
		Sample	Target	PAM	score	Mismatch Locations
		EMX1,+ target	GTCACCTCCAATGACTAGGG	TGG	82	-
		EMX off-target 1 (OT1)	AGGACCACCAATGACTAGGG	CAG	0.9	4MMs [1:2:3:7]
		EMX off-target 2 (OT2)	ACCACCTGTAATGACTAGGG	TAG	0.9	4MMs [1:2:8:9]
		DYRK1A,- target	GTTCCTTAAATAAGAACTTT	AGG	44	-
		DYRK1A off-target 1 (OT1)	GTTCCTTCCATAAGAACTTT	GGG	3.2	2MMs [8:9]
		DYRK1A off-target 2 (OT2)	TTGCCTTAATTAAGAACTTT	GGG	2.5	3MMs [1:3:10]
		Sample	Ref Seq w/out indexed adapters
		EMX1,+ target	AAAGTACAAACGGCAGAAGCTGGAGGAGGAAGGGCCTGAGTCCGAGCAGAAGAAGAAGGGCTCCCATCACATCAACCGGTGGCGCATTGCCACGAAGCAGGCCAATGGGGAGGACATCGATGTCACCTCCAATGACTAGGGTGGGCAACCACAAACCCACGAGGGCAGAGTGCTGCTTGCTGCTGGCCAGGCCCCTGCGTGGGCCCAAGCTGGACTCTGGCCACTCCCTGGCCAGGCTTTGGGGAGGCCTGGAGTCAT
		EMX off-target 1 (OT1)	CTCGGCCAATCCATCCTAGAGAAGCTGACATGAAAAGGAAGAAAGGATCACCATTACAGGTCACTTAGGAGTGGATTGTTATGCTGTATTATTATAGAAAAAGCTAACCCACATTCGAATTACACTTAAAACAGGGATACCTAACATGATTCTTTTTTGTGCATTTGGTGTGAATAGATGGCACCCAGCTGCCCTAGTCATTGGTGGTCCTCTTGAGAGATGTCAGCCACATTTCCCGGCTGACGCCCAGCTGGTGGTCACGGGCCGTTCCTCTAATGCATGTGCATCCTGCCCTATGCAGCATTCCCCAACAAGTCTATGGCCTCTACCGCATC
		EMX off-target 2 (OT2)	CGTCAATATTCATTGAGCTATACACAGGAATTGTGCACTTTTCTGATTATATGTTATAAATCAGTTACAATTTACTTAACAGTAATTATATATACTTTATTAATGTTTCAATATAACCTATTAGAACCCTGAAAATACTACCCTAGTCATTACAGGTGGTTCCATTTCTCTTCTTACACTCACTCAAAAGAAATATGAAGCATCAAGCTTTGGTAAAAGCCACCAAGATCTGTGCTGGATTGTAAGCCCCACCAGTGCAGGAACTAGCTGTTTAAATTTCTTTGTCTTCCAT
		DYRK1A,- target	GTCTTAAAGGTTGTTGCTGTTGCTTTACAAAAAGATTTTCTGAAGATTTTCTCAATACAAGTTTATATTCATTTTAATCACTATGGATCTTCTATACCATTAAAAACATAACTGTTGTGTTGAGTAACATATACCTGTTTGTAGTTAGAAAAGTTTTTTAATATTGAATATCCTAAAGTTCTTATTTAAGGAACCATTAGATATGTCAAATGATACAAACATTAGGATATGAATATTTCCTTTAAACCTCACTTATCTTCTTGTAGGAGGAGAGACTTCAGCATGCA
		DYRK1A off-target 1 (OT1)	ACGATGAAAGTCCTAACCCAGTAAGTAGTTGATTCAAATGTTGCCTAATAAATCCAAAACTTATTTAAACTCAACGCAATTTAAGTAAACCCATACTCCACTCAGCTAACACACAGCAGATTGTAATCCTGTCTCCTTGCCAAAAATGAAAGTTTGTCTCTGTTCCTTCCATAAGAACTTTGGGTTTTACTATATAGCATTTCAGGATTAGAACTGATCAATGCAAAATTGC
		DYRK1A off-target 2 (OT2)	ACCTGCCTCATGAGATTGCTGGATTAAAGAGCCTGATGTTTAATAGGTTTTGAGTATTATTATTATTACCATGAATAATATTTTTAAACGTGTGAGATTGCCTTAATTAAGAACTTTGGGTTTGACCTAATAGTGAAGAAATGAATTTGAACACACTTCCTGATATATCTTAAAGTAAAAATAAGTGAACAACAAGCCATGAAGTCTTGCTTGACTCCTTCCTTTTTCATATTCCACTCTCAGTCTGTCAGGAAATCTTGTTGCTT

## Sheet: NGS sequencing primers
MiSeq Primers for Lin,Staahl, Alla, Doudna. 2014
PCR#1 primers used to amplify target sequences from genomic DNA.
	genomic locus	Primer set name	Primer name	Adapeters for PCR#2:NNNNN:Target sequence.
	EMX1 target	primer set #1	BS237_Emx1,21 FWD 1 nextgenseq 335bp	ACACTCTTTCCCTACACGACGCTCTTCCGATCTNNNNNAAAGTACAAACGGCAGAAGCTGGAGGAG
			BS238_Emx1,21 REV 1 nextgenseq	GTGACTGGAGTTCAGACGTGTGCTCTTCCGATCTNNNNNATGACTCCAGGCCTCCCCAAAGCC
	EMX off-target 1 (OT1)	primer set #3	BS241_Emx1,21 OT-1 Fd nextgenseq 378bp	ACACTCTTTCCCTACACGACGCTCTTCCGATCTNNNNNCTCGGCCAATCCATCCTAGAGAAGCTGA
			BS242_Emx1,21 OT-1 Rv nextgenseq	GTGACTGGAGTTCAGACGTGTGCTCTTCCGATCTNNNNNGATGCGGTAGAGGCCATAGACTTGTTGG
	EMX off-target 2 (OT2)	primer set #4	BS243_Emx1,21 OT-2 Fd nextgenseq 370bp	ACACTCTTTCCCTACACGACGCTCTTCCGATCTNNNNNCGTCAATATTCATTGAGCTATACACAGGAATTGTGC
			BS244_Emx1,21 OT-2 Rv nextgenseq	GTGACTGGAGTTCAGACGTGTGCTCTTCCGATCTNNNNNATGGAAGACAAAGAAATTTAAACAGCTAGTTCCTGC
	DYRK1A target	primer set #2	BS239_DYRK1,32 FWD nextgenseq 365bp	ACACTCTTTCCCTACACGACGCTCTTCCGATCTNNNNNGTCTTAAAGGTTGTTGCTGTTGCTTTACA
			BS240_DYRK1,32 REV nextgenseq	GTGACTGGAGTTCAGACGTGTGCTCTTCCGATCTNNNNNTGCATGCTGAAGTCTCTCCTCCTACAAG
	DYRK1A off-target 1 (OT1)	primer set #5	BS245_DYRK1A OT-1 Fd nextgenseq 311bp	ACACTCTTTCCCTACACGACGCTCTTCCGATCTNNNNNACGATGAAAGTCCTAACCCAGTAAGTAGTTGA
			BS246_DYRK1A OT-1 Rv nextgenseq	GTGACTGGAGTTCAGACGTGTGCTCTTCCGATCTNNNNNGCAATTTTGCATTGATCAGTTCTAATCCTGAAATGC
	DYRK1A off-target 2 (OT2)	primer set #6	BS247_DYRK1A OT-2 Fd nextgenseq 343bp	ACACTCTTTCCCTACACGACGCTCTTCCGATCTNNNNNACCTGCCTCATGAGATTGCTGGATTAAAG
			BS248_DYRK1A OT-2 Rv nextgenseq	GTGACTGGAGTTCAGACGTGTGCTCTTCCGATCTNNNNNAAGCAACAAGATTTCCTGACAGACTGAGAGTG
PCR#2 primers used to Anneal indexed adapters.
			Primer name	indexed adapters
			Nextgen FWD Final	AATGATACGGCGACCACCGAGATCTACACTCTTTCCCTACACGACGCTCTTCCGATCT
			rev_index1	CAAGCAGAAGACGGCATACGAGATCGTGATGTGACTGGAGTTCAGACGTGTGCTCTTCCGATCT
			rev_index2	CAAGCAGAAGACGGCATACGAGATACATCGGTGACTGGAGTTCAGACGTGTGCTCTTCCGATCT
			rev_index3	CAAGCAGAAGACGGCATACGAGATGCCTAAGTGACTGGAGTTCAGACGTGTGCTCTTCCGATCT
			rev_index4	CAAGCAGAAGACGGCATACGAGATTGGTCAGTGACTGGAGTTCAGACGTGTGCTCTTCCGATCT
			rev_index5	CAAGCAGAAGACGGCATACGAGATCACTGTGTGACTGGAGTTCAGACGTGTGCTCTTCCGATCT
			rev_index6	CAAGCAGAAGACGGCATACGAGATATTGGCGTGACTGGAGTTCAGACGTGTGCTCTTCCGATCT
			rev_index7	CAAGCAGAAGACGGCATACGAGATGATCTGGTGACTGGAGTTCAGACGTGTGCTCTTCCGATCT
			rev_index8	CAAGCAGAAGACGGCATACGAGATTCAAGTGTGACTGGAGTTCAGACGTGTGCTCTTCCGATCT
			rev_index9	CAAGCAGAAGACGGCATACGAGATCTGATCGTGACTGGAGTTCAGACGTGTGCTCTTCCGATCT
			rev_index10	CAAGCAGAAGACGGCATACGAGATAAGCTAGTGACTGGAGTTCAGACGTGTGCTCTTCCGATCT
			rev_index11	CAAGCAGAAGACGGCATACGAGATGTAGCCGTGACTGGAGTTCAGACGTGTGCTCTTCCGATCT
			rev_index12	CAAGCAGAAGACGGCATACGAGATTACAAGGTGACTGGAGTTCAGACGTGTGCTCTTCCGATCT
			rev_index13	CAAGCAGAAGACGGCATACGAGATTTGACTGTGACTGGAGTTCAGACGTGTGCTCTTCCGATCT
			rev_index14	CAAGCAGAAGACGGCATACGAGATGGAACTGTGACTGGAGTTCAGACGTGTGCTCTTCCGATCT
			rev_index15	CAAGCAGAAGACGGCATACGAGATTGACATGTGACTGGAGTTCAGACGTGTGCTCTTCCGATCT
			rev_index16	CAAGCAGAAGACGGCATACGAGATGGACGGGTGACTGGAGTTCAGACGTGTGCTCTTCCGATCT
			rev_index17	CAAGCAGAAGACGGCATACGAGATCTCTACGTGACTGGAGTTCAGACGTGTGCTCTTCCGATCT
			rev_index18	CAAGCAGAAGACGGCATACGAGATGCGGACGTGACTGGAGTTCAGACGTGTGCTCTTCCGATCT
			rev_index19	CAAGCAGAAGACGGCATACGAGATTTTCACGTGACTGGAGTTCAGACGTGTGCTCTTCCGATCT
			rev_index20	CAAGCAGAAGACGGCATACGAGATGGCCACGTGACTGGAGTTCAGACGTGTGCTCTTCCGATCT
			rev_index21	CAAGCAGAAGACGGCATACGAGATCGAAACGTGACTGGAGTTCAGACGTGTGCTCTTCCGATCT
			rev_index22	CAAGCAGAAGACGGCATACGAGATCGTACGGTGACTGGAGTTCAGACGTGTGCTCTTCCGATCT
			rev_index23	CAAGCAGAAGACGGCATACGAGATCCACTCGTGACTGGAGTTCAGACGTGTGCTCTTCCGATCT
			rev_index24	CAAGCAGAAGACGGCATACGAGATGCTACCGTGACTGGAGTTCAGACGTGTGCTCTTCCGATCT
			rev_index25	CAAGCAGAAGACGGCATACGAGATATCAGTGTGACTGGAGTTCAGACGTGTGCTCTTCCGATCT
			rev_index26	CAAGCAGAAGACGGCATACGAGATGCTCATGTGACTGGAGTTCAGACGTGTGCTCTTCCGATCT
			rev_index27	CAAGCAGAAGACGGCATACGAGATAGGAATGTGACTGGAGTTCAGACGTGTGCTCTTCCGATCT
			rev_index28	CAAGCAGAAGACGGCATACGAGATCTTTTGGTGACTGGAGTTCAGACGTGTGCTCTTCCGATCT
			rev_index29	CAAGCAGAAGACGGCATACGAGATTAGTTGGTGACTGGAGTTCAGACGTGTGCTCTTCCGATCT
			rev_index30	CAAGCAGAAGACGGCATACGAGATCCGGTGGTGACTGGAGTTCAGACGTGTGCTCTTCCGATCT
			rev_index31	CAAGCAGAAGACGGCATACGAGATATCGTGGTGACTGGAGTTCAGACGTGTGCTCTTCCGATCT
			rev_index32	CAAGCAGAAGACGGCATACGAGATTGAGTGGTGACTGGAGTTCAGACGTGTGCTCTTCCGATCT
			rev_index33	CAAGCAGAAGACGGCATACGAGATCGCCTGGTGACTGGAGTTCAGACGTGTGCTCTTCCGATCT
			rev_index34	CAAGCAGAAGACGGCATACGAGATGCCATGGTGACTGGAGTTCAGACGTGTGCTCTTCCGATCT
			rev_index35	CAAGCAGAAGACGGCATACGAGATAAAATGGTGACTGGAGTTCAGACGTGTGCTCTTCCGATCT
			rev_index36	CAAGCAGAAGACGGCATACGAGATTGTTGGGTGACTGGAGTTCAGACGTGTGCTCTTCCGATCT
			rev_index37	CAAGCAGAAGACGGCATACGAGATATTCCGGTGACTGGAGTTCAGACGTGTGCTCTTCCGATCT
			rev_index38	CAAGCAGAAGACGGCATACGAGATAGCTAGGTGACTGGAGTTCAGACGTGTGCTCTTCCGATCT
			rev_index39	CAAGCAGAAGACGGCATACGAGATGTATAGGTGACTGGAGTTCAGACGTGTGCTCTTCCGATCT
			rev_index40	CAAGCAGAAGACGGCATACGAGATTCTGAGGTGACTGGAGTTCAGACGTGTGCTCTTCCGATCT
			rev_index41	CAAGCAGAAGACGGCATACGAGATGTCGTCGTGACTGGAGTTCAGACGTGTGCTCTTCCGATCT
			rev_index42	CAAGCAGAAGACGGCATACGAGATCGATTAGTGACTGGAGTTCAGACGTGTGCTCTTCCGATCT
			rev_index43	CAAGCAGAAGACGGCATACGAGATGCTGTAGTGACTGGAGTTCAGACGTGTGCTCTTCCGATCT
			rev_index44	CAAGCAGAAGACGGCATACGAGATATTATAGTGACTGGAGTTCAGACGTGTGCTCTTCCGATCT
			rev_index45	CAAGCAGAAGACGGCATACGAGATGAATGAGTGACTGGAGTTCAGACGTGTGCTCTTCCGATCT
			rev_index46	CAAGCAGAAGACGGCATACGAGATTCGGGAGTGACTGGAGTTCAGACGTGTGCTCTTCCGATCT
			rev_index47	CAAGCAGAAGACGGCATACGAGATCTTCGAGTGACTGGAGTTCAGACGTGTGCTCTTCCGATCT
			rev_index48	CAAGCAGAAGACGGCATACGAGATTGCCGAGTGACTGGAGTTCAGACGTGTGCTCTTCCGATCT

## Sheet: NGS Analysis
NGS analysis of indel and HDR editing at EMX1 and DYRK1A on target and potential off-target loci. Lin,Staahl, Alla, Doudna. 2014
		rev_indexed adapter #	RNP Conc. (pmol)	primer set#_Sample name	indel reads/total reads (%)	HDR reads /total reads (%)	HDR reads /indel reads (%)			rev_indexed adapter #	RNP Conc. (pmol)	primer set#_Sample name	indel reads/total reads (%)	HDR reads /total reads (%)	HDR reads /indel reads (%)
	EMX1 Target	1	0	1_WT	0.211803	0	0
		2	0	1_EMX_100pmol_noguide	0.1892	0	0		DYRK1A Target	27	0	2_WT	0.188194	0	0
		5	10	1_EMX_10pmol	4.00886	0.672141	16.7664			28	10	2_DYRK_10pmol	4.47548	0.71216	15.9125
		6	30	1_EMX_30pmol	20.9362	3.44908	16.4742			29	30	2_DYRK_30pmol	16.6722	2.24846	15.9125
		7	100	1_EMX_100pmol	43.2808	8.83673	20.4172			30	100	2_DYRK_100pmol	34.7478	6.08631	17.5156
		8	10	1_EMX_NOC_10pmol	11.6299	4.22942	36.3666			31	10	2_DYRK_NOC_10pmol	21.1773	8.00416	37.7959
		9	30	1_EMX_NOC_30pmol	34.4498	12.6665	36.768			32	30	2_DYRK_NOC_30pmol	47.2358	17.6227	37.3079
		10	100	1_EMX_NOC_100pmol	59.5729	17.2153	28.8979			33	100	2_DYRK_NOC_100pmol	71.2177	24.0883	33.8234
	EMX1 off-target 1 (OT1)	19	0	3_WT	0.113545	0	0
		20	0	3_EMX_100pmol_noguide	0.11547	0	0		DYRK1A off-target1 (OT1)	34	0	5_WT	0.0978963	0	0
		21	10	3_EMX_10pmol	0.0911795	0	0			35	10	5_DYRK_10pmol	0.0881864	0	0
		22	30	3_EMX_30pmol	0.0977941	0	0			36	30	5_DYRK_30pmol	0.94646	0	0
		23	100	3_EMX_100pmol	0.092379	0	0			37	100	5_DYRK_100pmol	0.371385	0	0
		24	10	3_EMX_NOC_10pmol	0.0911497	0	0			38	10	5_DYRK_NOC_10pmol	0.12188	0	0
		25	30	3_EMX_NOC_30pmol	0.104872	0	0			39	30	5_DYRK_NOC_30pmol	0.105757	0	0
		26	100	3_EMX_NOC_100pmol	0.337775	0	0			40	100	5_DYRK_NOC_100pmol	0.0800925	0	0
	EMX1 off-target 2 (OT2)	11	0	4_WT	0.578907	0	0
		12	0	4_EMX_100pmol_noguide	0.307468	0	0		DYRK1A off-target2 (OT2)	41	0	6_WT	0.474613	0	0
		13	10	4_EMX_10pmol	0.294106	0	0			42	10	6_DYRK_10pmol	1.01153	0	0
		14	30	4_EMX_30pmol	0.294462	0	0			43	30	6_DYRK_30pmol	0.246906	0	0
		15	100	4_EMX_100pmol	0.303415	0	0			44	100	6_DYRK_100pmol	0.18701	0	0
		16	10	4_EMX_NOC_10pmol	0.315696	0	0			45	10	6_DYRK_NOC_10pmol	0.218555	0	0
		17	30	4_EMX_NOC_30pmol	0.34201	0	0			46	30	6_DYRK_NOC_30pmol	0.223536	0	0
		18	100	4_EMX_NOC_100pmol	0.279556	0	0			47	100	6_DYRK_NOC_100pmol	0.510486	0	0

## Sheet: NGS read data
Sample	#reads_53nt	%HR and % indels	%HR and % indels norm to WT	%HR/indels	%HR/indels norm to WT
1-EMX-100pmol-noguide:reads with HR	0	0	#DIV/0!	0	#DIV/0!
1-EMX-100pmol-noguide:reads with indels	275	0.1892	0.893282
1-EMX-100pmol-noguide:reads without indels	145074
1-EMX-100pmol-nossODNA:reads with HR	0	0	#DIV/0!	0	#DIV/0!
1-EMX-100pmol-nossODNA:reads with indels	12974	46.4003	219.073
1-EMX-100pmol-nossODNA:reads without indels	14987
1-EMX-100pmol:reads with HR	4943	8.83673	#DIV/0!	20.4172	#DIV/0!
1-EMX-100pmol:reads with indels	24210	43.2808	204.345
1-EMX-100pmol:reads without indels	31727
1-EMX-10pmol:reads with HR	925	0.672141	#DIV/0!	16.7664	#DIV/0!
1-EMX-10pmol:reads with indels	5517	4.00886	18.9273
1-EMX-10pmol:reads without indels	132103
1-EMX-30pmol:reads with HR	2825	3.44908	#DIV/0!	16.4742	#DIV/0!
1-EMX-30pmol:reads with indels	17148	20.9362	98.8475
1-EMX-30pmol:reads without indels	64758
1-EMX-NOC-100pmol-dsODNA-7:reads with HR	0	0	#DIV/0!	0	#DIV/0!
1-EMX-NOC-100pmol-dsODNA-7:reads with indels	137030	28.749	135.734
1-EMX-NOC-100pmol-dsODNA-7:reads without indels	339613
1-EMX-NOC-100pmol-nossODNA:reads with HR	3	0.00356536	#DIV/0!	0.0238322	#DIV/0!
1-EMX-NOC-100pmol-nossODNA:reads with indels	12588	14.9602	70.6328
1-EMX-NOC-100pmol-nossODNA:reads without indels	71555
1-EMX-NOC-100pmol:reads with HR	8472	17.2153	#DIV/0!	28.8979	#DIV/0!
1-EMX-NOC-100pmol:reads with indels	29317	59.5729	281.265
1-EMX-NOC-100pmol:reads without indels	19895
1-EMX-NOC-10pmol:reads with HR	3297	4.22942	#DIV/0!	36.3666	#DIV/0!
1-EMX-NOC-10pmol:reads with indels	9066	11.6299	54.9092
1-EMX-NOC-10pmol:reads without indels	68888
1-EMX-NOC-30pmol:reads with HR	4489	12.6665	#DIV/0!	36.768	#DIV/0!
1-EMX-NOC-30pmol:reads with indels	12209	34.4498	162.65
1-EMX-NOC-30pmol:reads without indels	23231
1-WT:reads with HR	0	0	#DIV/0!	0	#DIV/0!
1-WT:reads with indels	234	0.211803	1
1-WT:reads without indels	110246
2-DYRK-100pmol:reads with HR	6523	6.08631	#DIV/0!	17.5156	#DIV/0!
2-DYRK-100pmol:reads with indels	37241	34.7478	184.639
2-DYRK-100pmol:reads without indels	69934
2-DYRK-10pmol:reads with HR	749	0.71216	#DIV/0!	15.9125	#DIV/0!
2-DYRK-10pmol:reads with indels	4707	4.47548	23.7813
2-DYRK-10pmol:reads without indels	100466
2-DYRK-30pmol:reads with HR	2798	2.24846	#DIV/0!	13.4863	#DIV/0!
2-DYRK-30pmol:reads with indels	20747	16.6722	88.5905
2-DYRK-30pmol:reads without indels	103694
2-DYRK-NOC-100pmol:reads with HR	14769	24.0883	#DIV/0!	33.8234	#DIV/0!
2-DYRK-NOC-100pmol:reads with indels	43665	71.2177	378.428
2-DYRK-NOC-100pmol:reads without indels	17647
2-DYRK-NOC-10pmol:reads with HR	6547	8.00416	#DIV/0!	37.7959	#DIV/0!
2-DYRK-NOC-10pmol:reads with indels	17322	21.1773	112.53
2-DYRK-NOC-10pmol:reads without indels	64473
2-DYRK-NOC-30pmol:reads with HR	11023	17.6227	#DIV/0!	37.3079	#DIV/0!
2-DYRK-NOC-30pmol:reads with indels	29546	47.2358	250.996
2-DYRK-NOC-30pmol:reads without indels	33004
2-WT:reads with HR	0	0	#DIV/0!	0	#DIV/0!
2-WT:reads with indels	155	0.188194	1
2-WT:reads without indels	82207
3-EMX-100pmol-noguide:reads with HR	0	0	#DIV/0!	0	#DIV/0!
3-EMX-100pmol-noguide:reads with indels	261	0.307468	0.531118
3-EMX-100pmol-noguide:reads without indels	84626
3-EMX-100pmol:reads with HR	0	0	#DIV/0!	0	#DIV/0!
3-EMX-100pmol:reads with indels	287	0.303415	0.524117
3-EMX-100pmol:reads without indels	94303
3-EMX-10pmol:reads with HR	0	0	#DIV/0!	0	#DIV/0!
3-EMX-10pmol:reads with indels	306	0.294106	0.508038
3-EMX-10pmol:reads without indels	103738
3-EMX-30pmol:reads with HR	0	0	#DIV/0!	0	#DIV/0!
3-EMX-30pmol:reads with indels	254	0.294462	0.508652
3-EMX-30pmol:reads without indels	86005
3-EMX-NOC-100pmol:reads with HR	0	0	#DIV/0!	0	#DIV/0!
3-EMX-NOC-100pmol:reads with indels	293	0.279556	0.482904
3-EMX-NOC-100pmol:reads without indels	104516
3-EMX-NOC-10pmol:reads with HR	0	0	#DIV/0!	0	#DIV/0!
3-EMX-NOC-10pmol:reads with indels	271	0.315696	0.545332
3-EMX-NOC-10pmol:reads without indels	85571
3-EMX-NOC-30pmol:reads with HR	0	0	#DIV/0!	0	#DIV/0!
3-EMX-NOC-30pmol:reads with indels	393	0.34201	0.590786
3-EMX-NOC-30pmol:reads without indels	114516
3-WT:reads with HR	0	0	#DIV/0!	0	#DIV/0!
3-WT:reads with indels	591	0.578907	1
3-WT:reads without indels	101498
4-EMX-100pmol-noguide:reads with HR	0	0	#DIV/0!	0	#DIV/0!
4-EMX-100pmol-noguide:reads with indels	251	0.11547	1.01696
4-EMX-100pmol-noguide:reads without indels	217122
4-EMX-100pmol:reads with HR	0	0	#DIV/0!	0	#DIV/0!
4-EMX-100pmol:reads with indels	199	0.092379	0.813593
4-EMX-100pmol:reads without indels	215218
4-EMX-10pmol:reads with HR	0	0	#DIV/0!	0	#DIV/0!
4-EMX-10pmol:reads with indels	217	0.0911795	0.803029
4-EMX-10pmol:reads without indels	237775
4-EMX-30pmol:reads with HR	0	0	#DIV/0!	0	#DIV/0!
4-EMX-30pmol:reads with indels	219	0.0977941	0.861284
4-EMX-30pmol:reads without indels	223721
4-EMX-NOC-100pmol:reads with HR	0	0	#DIV/0!	0	#DIV/0!
4-EMX-NOC-100pmol:reads with indels	713	0.337775	2.97483
4-EMX-NOC-100pmol:reads without indels	210374
4-EMX-NOC-10pmol:reads with HR	0	0	#DIV/0!	0	#DIV/0!
4-EMX-NOC-10pmol:reads with indels	289	0.0911497	0.802766
4-EMX-NOC-10pmol:reads without indels	316772
4-EMX-NOC-30pmol:reads with HR	0	0	#DIV/0!	0	#DIV/0!
4-EMX-NOC-30pmol:reads with indels	201	0.104872	0.923616
4-EMX-NOC-30pmol:reads without indels	191462
4-WT:reads with HR	0	0	#DIV/0!	0	#DIV/0!
4-WT:reads with indels	295	0.113545	1
4-WT:reads without indels	259515
5-DYRK-100pmol:reads with HR	0	0	#DIV/0!	0	#DIV/0!
5-DYRK-100pmol:reads with indels	786	0.371385	3.79366
5-DYRK-100pmol:reads without indels	210854
5-DYRK-10pmol:reads with HR	0	0	#DIV/0!	0	#DIV/0!
5-DYRK-10pmol:reads with indels	232	0.0881864	0.900814
5-DYRK-10pmol:reads without indels	262847
5-DYRK-30pmol:reads with HR	0	0	#DIV/0!	0	#DIV/0!
5-DYRK-30pmol:reads with indels	1874	0.94646	9.66798
5-DYRK-30pmol:reads without indels	196127
5-DYRK-NOC-100pmol:reads with HR	0	0	#DIV/0!	0	#DIV/0!
5-DYRK-NOC-100pmol:reads with indels	187	0.0800925	0.818136
5-DYRK-NOC-100pmol:reads without indels	233293
5-DYRK-NOC-10pmol:reads with HR	0	0	#DIV/0!	0	#DIV/0!
5-DYRK-NOC-10pmol:reads with indels	345	0.12188	1.24499
5-DYRK-NOC-10pmol:reads without indels	282720
5-DYRK-NOC-30pmol:reads with HR	0	0	#DIV/0!	0	#DIV/0!
5-DYRK-NOC-30pmol:reads with indels	209	0.105757	1.08029
5-DYRK-NOC-30pmol:reads without indels	197414
5-WT:reads with HR	0	0	#DIV/0!	0	#DIV/0!
5-WT:reads with indels	176	0.0978963	1
5-WT:reads without indels	179606
6-DYRK-100pmol:reads with HR	0	0	#DIV/0!	0	#DIV/0!
6-DYRK-100pmol:reads with indels	100	0.18701	0.394027
6-DYRK-100pmol:reads without indels	53373
6-DYRK-10pmol:reads with HR	0	0	#DIV/0!	0	#DIV/0!
6-DYRK-10pmol:reads with indels	853	1.01153	2.13127
6-DYRK-10pmol:reads without indels	83475
6-DYRK-30pmol:reads with HR	0	0	#DIV/0!	0	#DIV/0!
6-DYRK-30pmol:reads with indels	165	0.246906	0.520226
6-DYRK-30pmol:reads without indels	66662
6-DYRK-NOC-100pmol:reads with HR	0	0	#DIV/0!	0	#DIV/0!
6-DYRK-NOC-100pmol:reads with indels	342	0.510486	1.07558
6-DYRK-NOC-100pmol:reads without indels	66653
6-DYRK-NOC-10pmol:reads with HR	0	0	#DIV/0!	0	#DIV/0!
6-DYRK-NOC-10pmol:reads with indels	116	0.218555	0.46049
6-DYRK-NOC-10pmol:reads without indels	52960
6-DYRK-NOC-30pmol:reads with HR	0	0	#DIV/0!	0	#DIV/0!
6-DYRK-NOC-30pmol:reads with indels	141	0.223536	0.470987
6-DYRK-NOC-30pmol:reads without indels	62936
6-WT:reads with HR	0	0	#DIV/0!	0	#DIV/0!
6-WT:reads with indels	798	0.474613	1
6-WT:reads without indels	167339
