# Supplementary figures and images for: Enhanced homology-directed human genome engineering by controlled timing of CRISPR/Cas9 delivery
Source: eLife journal article supplement (doi:10.7554/elife.04766), 2014-12-15

# Figure 1-figure supplement 1

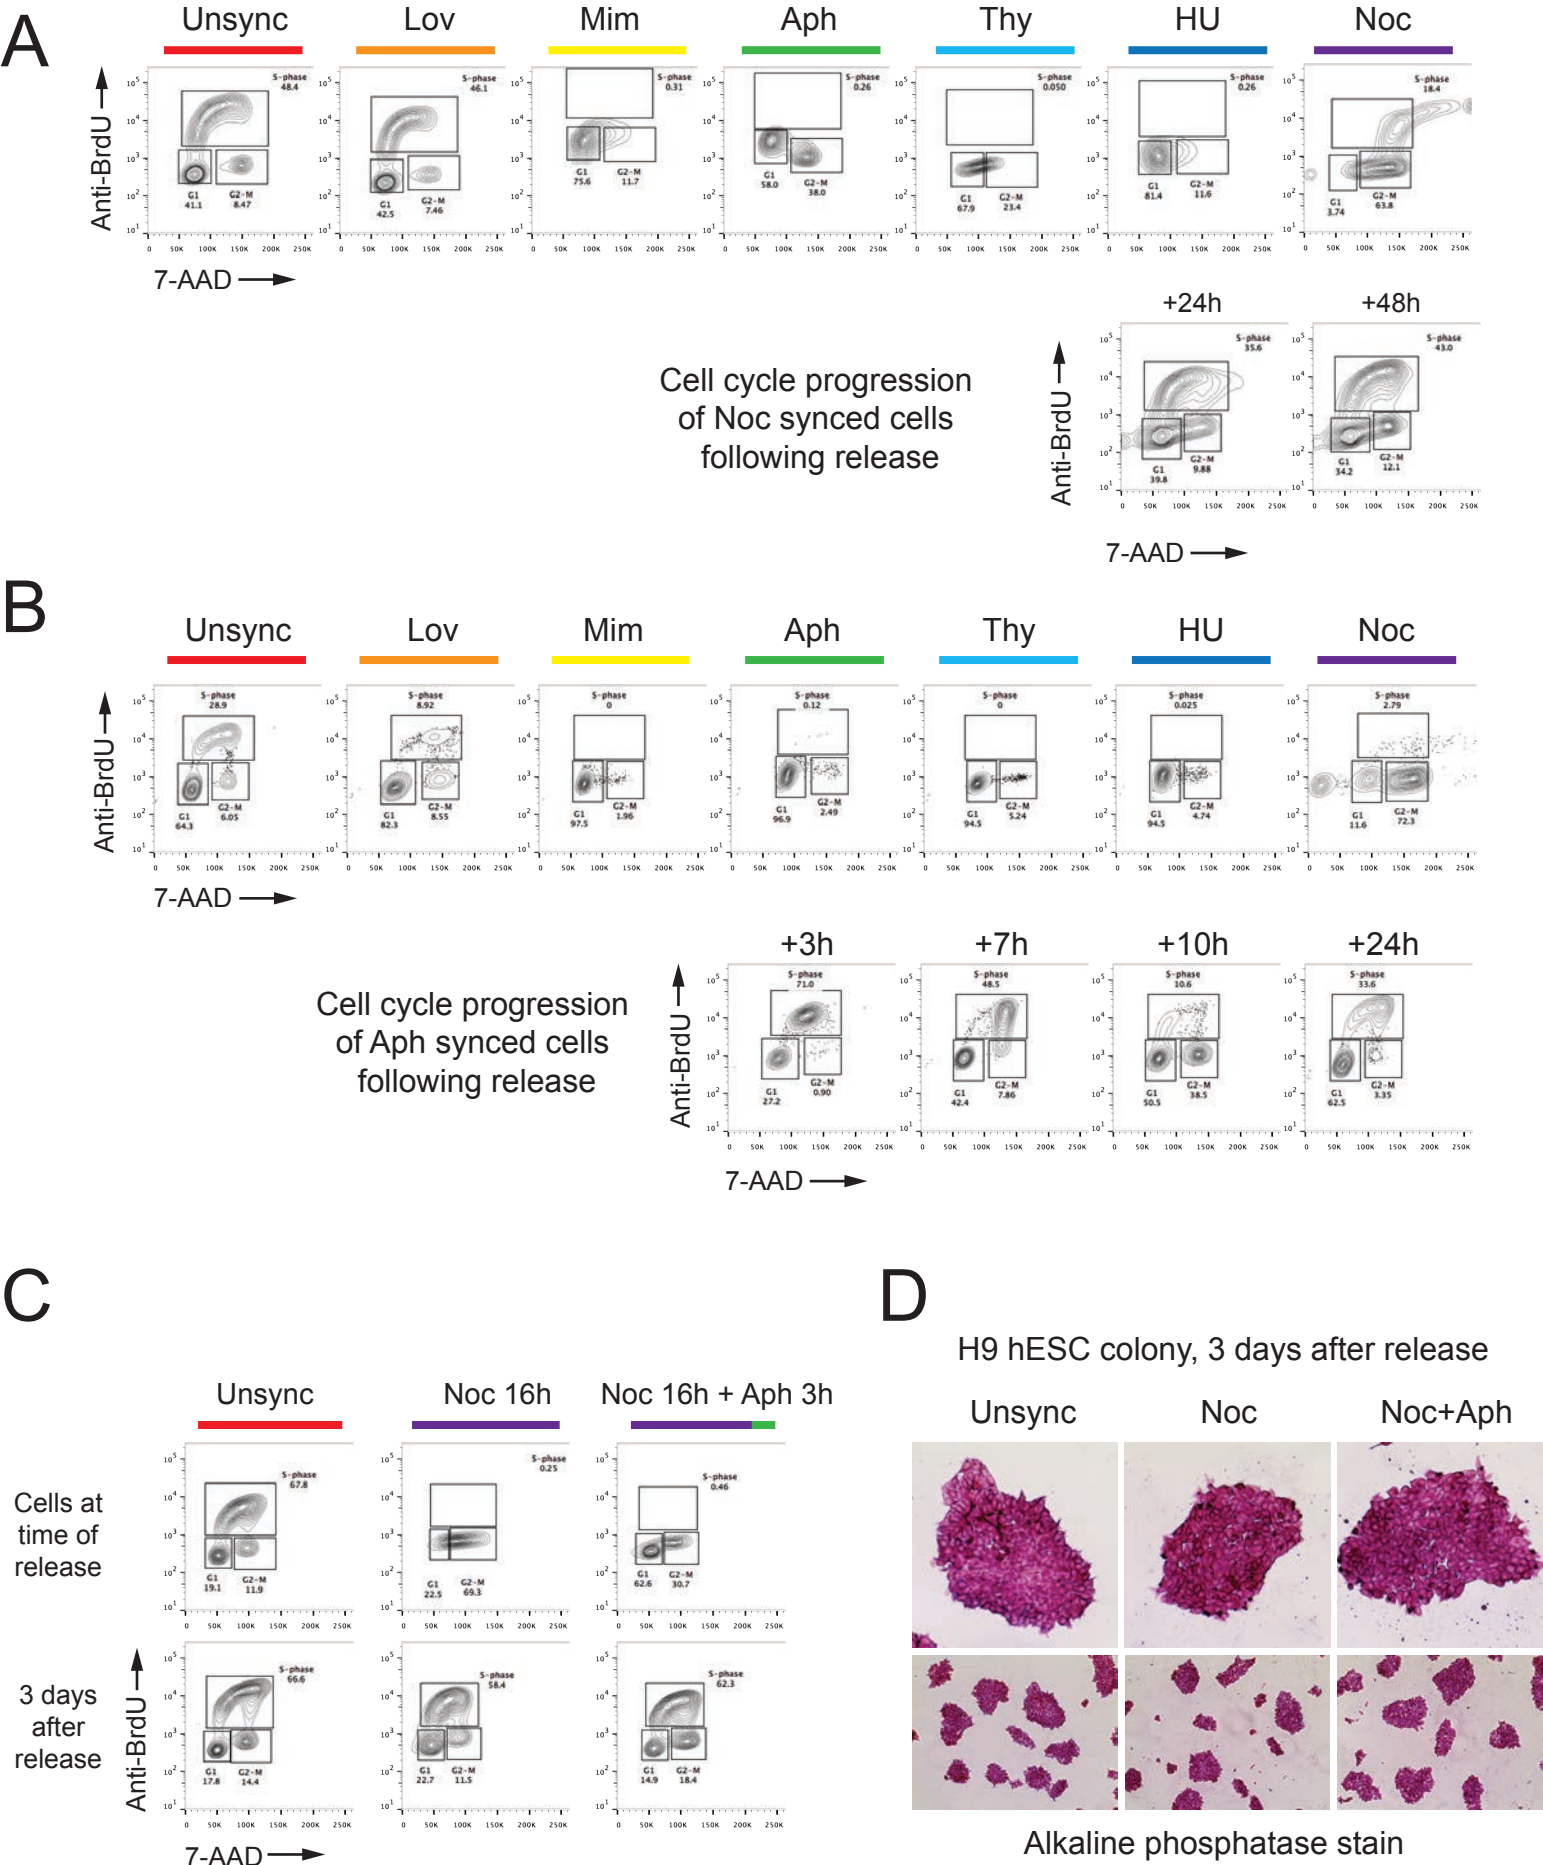

Supplement: supp [file elife_poa_e04766_Figure_1_figure_supplement_1.pdf › elife_poa_e04766_Figure_1_figure_supplement_1.pdf]

Figure 2-figure supplement 1

A

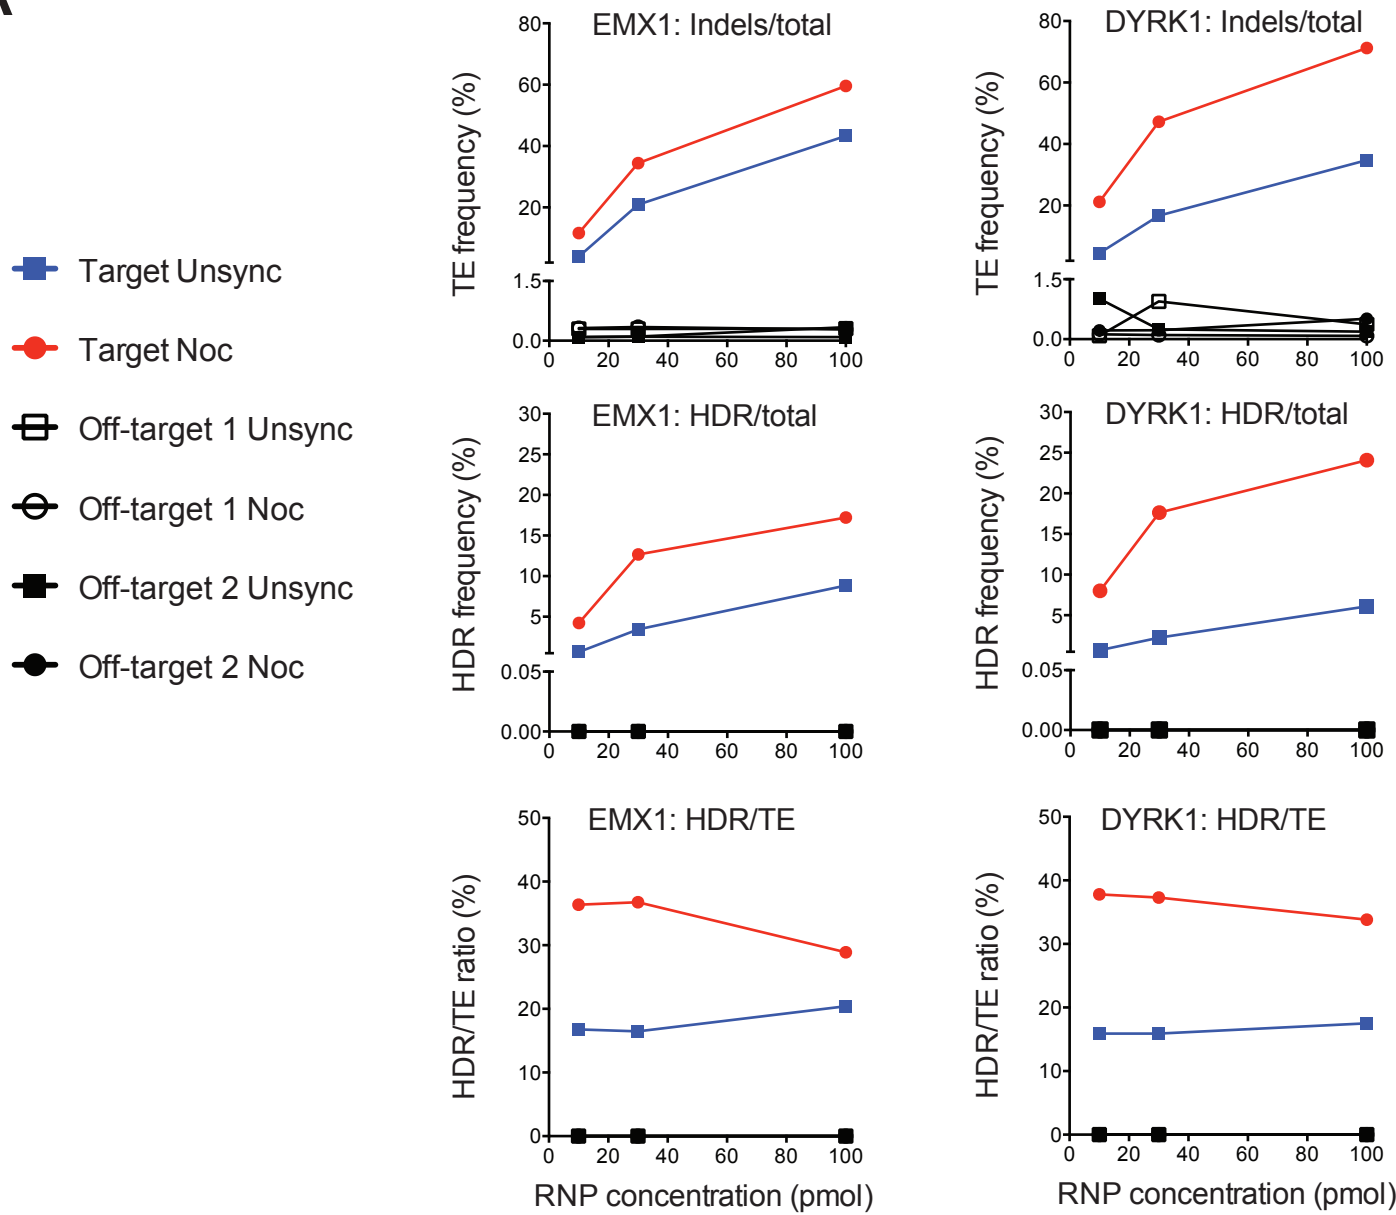

B

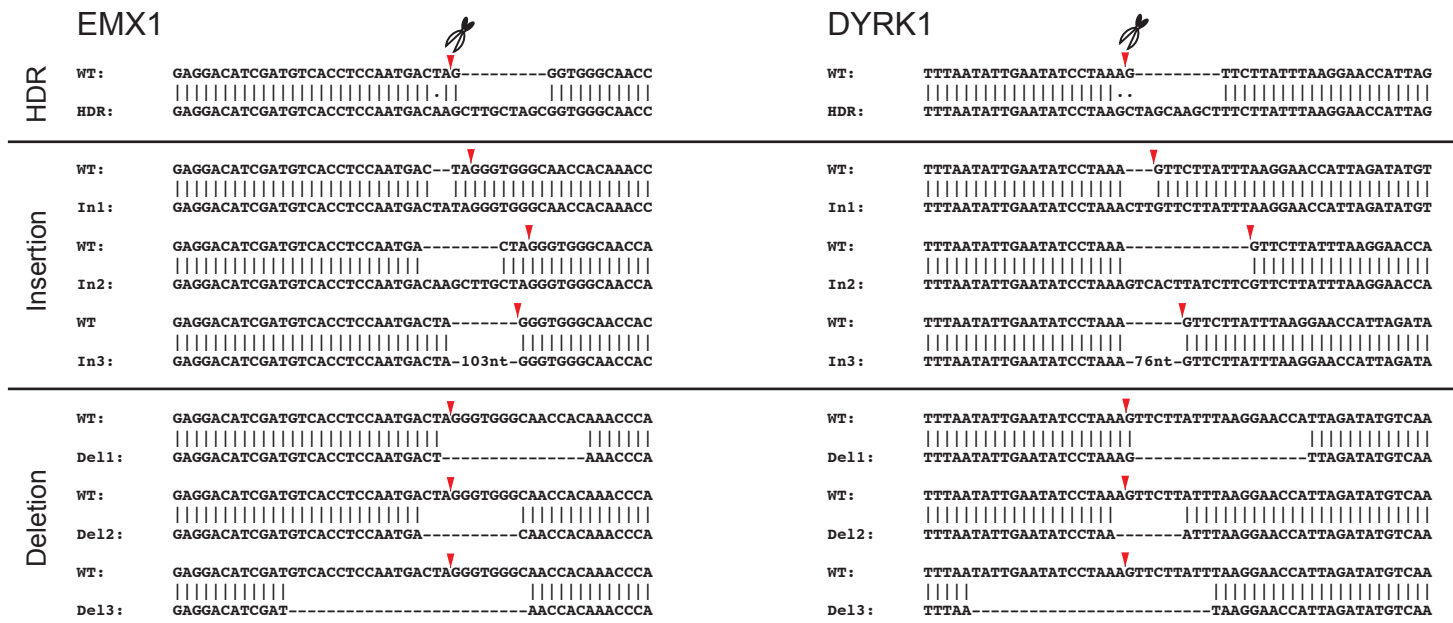

Supplement: supp [file elife_poa_e04766_Figure_2_figure_supplement_1.pdf › elife_poa_e04766_Figure_2_figure_supplement_1.pdf]
